# Supplementary material for: Single-photon absorption of isolated collagen mimetic peptides and triple-helix models in the VUV-X energy range
Source: Royal Society of Chemistry journal article supplement (doi:10.1039/c7cp02527k), 2017-01-01
Supplement: c7cp02527k1.pdf [file c7cp02527k1.pdf]

## Supplementary Information for

# Single-photon absorption of isolated collagen mimetic peptides and triple-helix models in the VUV-X energy range

L. Schwob<sup>a</sup>, M. Lalande<sup>a</sup>, J. Rangama<sup>a</sup>, D. Egorov<sup>b</sup>, R. Hoekstra<sup>b</sup>, R. Pandey<sup>c</sup>, S. Eden<sup>c</sup>, T. Schlathölter<sup>b</sup>,  
V. Vizcaino<sup>a</sup> and J.-C. Pouilly<sup>\*a</sup>

[a] CIMAP laboratory, Université de Caen Normandie/CEA/CNRS/ENSICAEN, Bd Becquerel 14070 CAEN Cedex 5

[b] Zernike Institute for Advanced Materials, University of Groningen Nijenborgh 4, 9747AG Groningen

[c] Dept. of Physical Sciences, The Open University, Walton Hall, Milton Keynes, MK7 6AA, UK

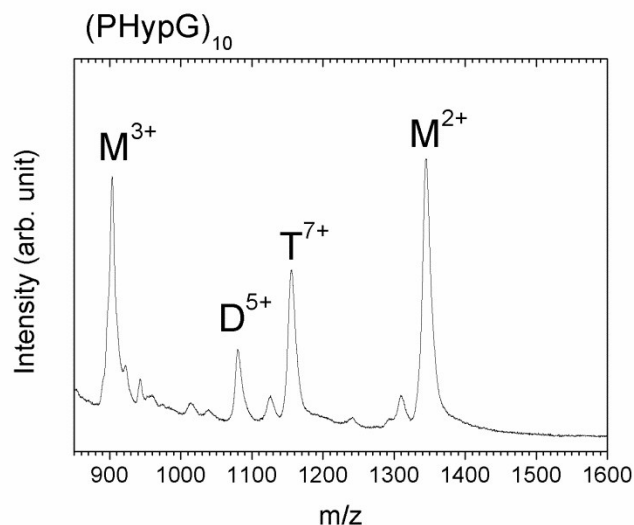

**Figure S1** ESI mass spectrum of a solution containing  $((\text{PHypG})_{10})_3$  triple helix models. The main peaks are doubly- and triply-protonated  $(\text{PHypG})_{10}$  monomers, the dimer  $\text{D}^{5+}$  and the trimer  $\text{T}^{7+}$ . The relative intensities do not reliably reflect the relative abundance of the species formed by ESI, since they also depend on the QMS and funnel settings.

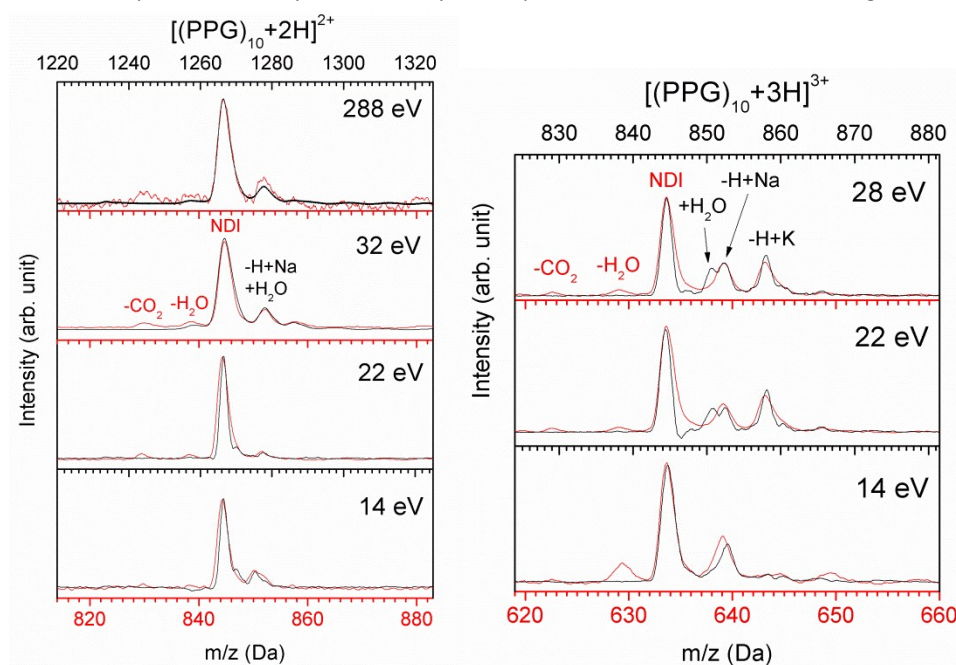

**Figure S2** Superimposition of the mass spectra of the  $(\text{PPG})_{10}$  monomers without (in black) and with the photon beam (in red), in single-photon absorption conditions. We show only the region corresponding to the precursor ion for the former and to non-dissociative ionization for the latter.  $\text{H}_2\text{O}$  and  $\text{CO}_2$  losses after ionization are indicated, as well as  $\text{H}_2\text{O}$ , Na and K adducts.
